# Supplementary figures and images for: Multinomial Convolutions for Joint Modeling of Regulatory Motifs and Sequence Activity Readouts
Source: MDPI journal article supplement (doi:10.3390/genes13091614), 2022-09-08

(A) Novel Repressors

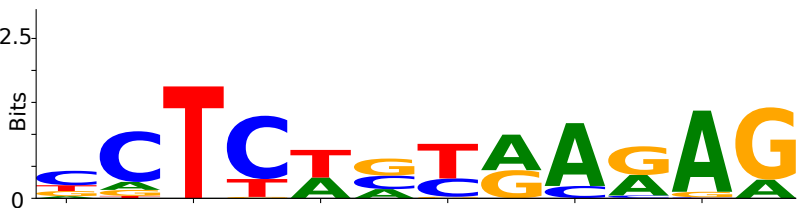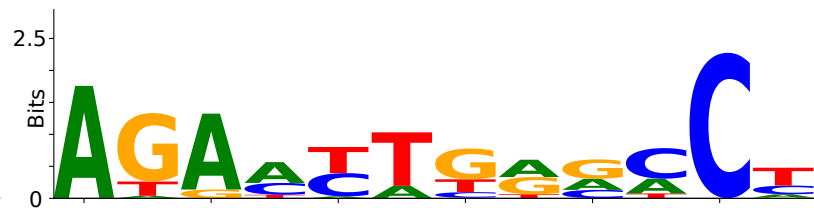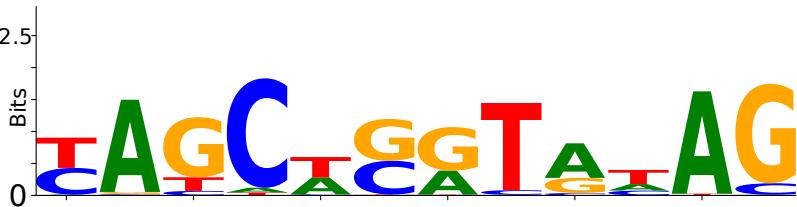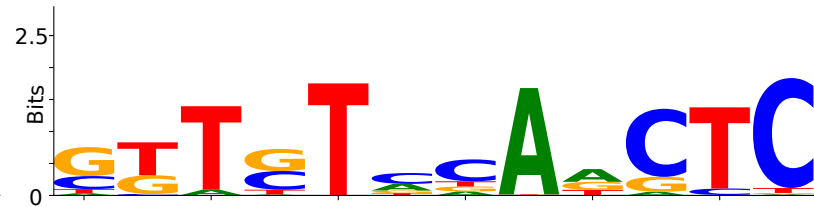

(B) Novel Activator

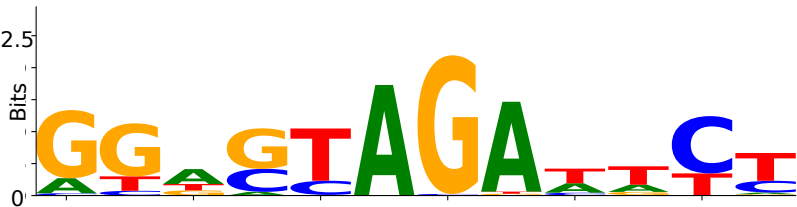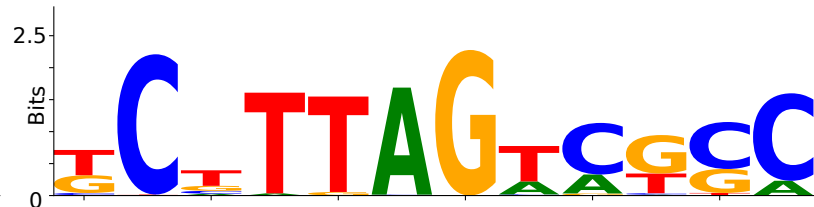

Supplement: s1 [file s1]
